# Supplementary material
Source: PubMed Central journal article supplement (PMC8961397)

## Supplementary Online Content

Xian Y, Xu H, Smith EE, et al. Evaluation of evidence-based dual antiplatelet therapy for secondary prevention in US patients with acute ischemic stroke. *JAMA Intern Med*. Published online March 28, 2022. doi:10.1001/jamainternmed.2022.0323

### **eFigure.** Study Population

This supplementary material has been provided by the authors to give readers additional information about their work.

**eFigure. Study Population**

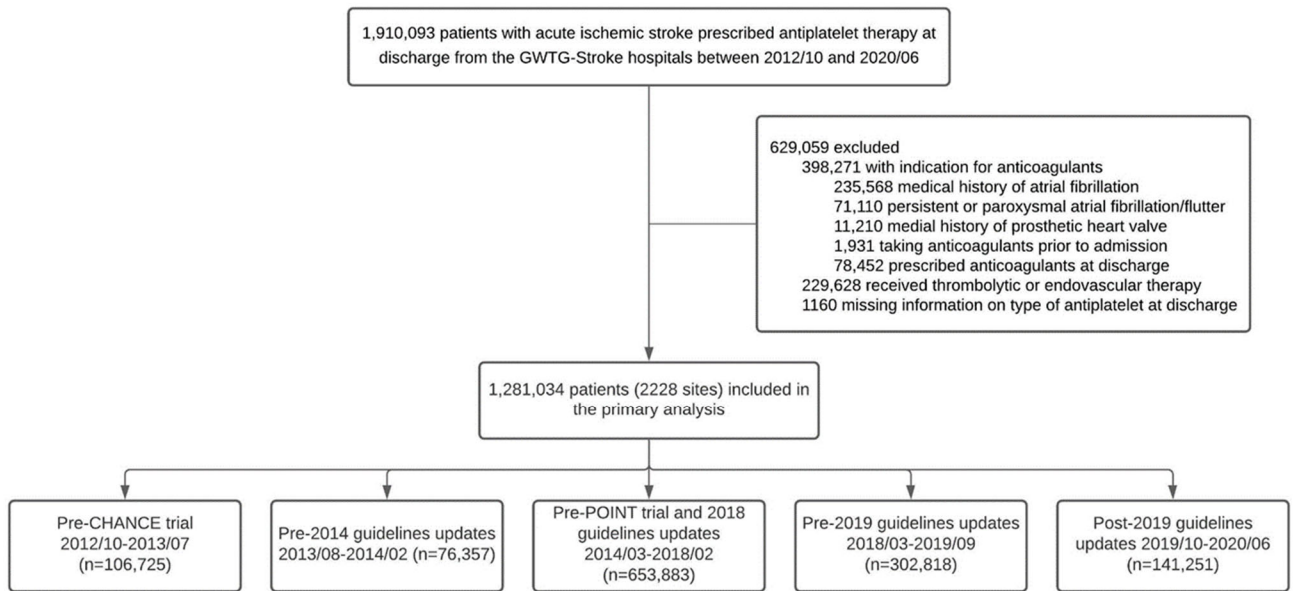

Supplement: jamainternmed-e220323-s001.pdf [file jamainternmed-e220323-s001.pdf]
